# Supplementary material
Source: publisher figshare collection journal article supplement (https://sage.figshare.com/ndownloader/files/14661404)
Supplement: Supplementary file 1 [file 14661404]

**ONLINE-ONLY SUPPLEMENTARY MATERIAL**

**Supplementary Table I. Change in worst tear film osmolarity between both eyes after 6 months randomised treatment with CsA CE or vehicle in patients with baseline values >308 mOsms/L**

|                                        | <b>CsA CE<br/>n=154</b> | <b>Vehicle<br/>n=91</b> | <b>p value</b> |
|----------------------------------------|-------------------------|-------------------------|----------------|
| <b>Tear film osmolarity (mOsms/L)</b>  |                         |                         |                |
| Baseline                               | n=34                    | n=21                    |                |
| Mean±SD                                | 331.0±20.2              | 321.5±10.5              |                |
| Median (min, max)                      | 327.5 (309.0, 385.0)    | 319.0 (310.0, 346.0)    |                |
| Change at Month 6                      | n=25                    | n=17                    |                |
| Mean±SD                                | -25.2±18.5              | -9.5±17.5               |                |
| Adjusted mean (95%<br>CI) <sup>a</sup> | -26.7 (-35.0, -18.3)    | -16.7(-25.0, -8.4)      | p=0.048        |
| Median (min, max)                      | -24.0 (-72.0, 0.0)      | -9.0 (-38.0, 19.0)      |                |

Data represent a subgroup of the FAS population.

CsA CE: 0.1% ciclosporin A cationic emulsion; SD: standard deviation; 95% CI: 95% confidence interval.

<sup>a</sup> Means were adjusted for baseline values using an analysis of covariance (ANCOVA) model with the fixed factors: “treatment” and “pooled country” and the baseline data as covariate.

**Supplementary Table II. Summary of adverse events recorded during the study**

| <b>TEAEs</b>                                     | <b>CsA CE<br/>6 months<br/>n=154</b> |                     | <b>Vehicle<br/>6 months<br/>n=90</b> |                     | <b>CsA CE<br/>12 months<br/>n=154</b> |                     |
|--------------------------------------------------|--------------------------------------|---------------------|--------------------------------------|---------------------|---------------------------------------|---------------------|
|                                                  | <b>n (%)<br/>patients</b>            | <b>n<br/>events</b> | <b>n (%)<br/>patients</b>            | <b>n<br/>events</b> | <b>n (%)<br/>patients</b>             | <b>n<br/>events</b> |
| Any TEAE                                         | 88 (57.1)                            | 175                 | 42 (46.7)                            | 88                  | 113 (73.4)                            | 275                 |
| Any treatment-related TEAE                       | 57 (37.0)                            | 95                  | 19 (21.1)                            | 30                  | 70 (45.5)                             | 128                 |
| Any ocular TEAE                                  | 66 (42.9)                            | 112                 | 27 (30.0)                            | 44                  | 86 (55.8)                             | 160                 |
| Any treatment-related ocular TEAEs               | 57 (37.0)                            | 90                  | 18 (20.0)                            | 29                  | 70 (45.5)                             | 118                 |
| Any TEAE leading to discontinuation <sup>a</sup> | 21 (13.6)                            | 34                  | 9 (10.0)                             | 11                  | 31 (20.1)                             | 51                  |
| Any ocular TEAE leading to discontinuation       | 18 (11.7)                            | 29                  | 6 (6.7)                              | 8                   | 27 (17.5)                             | 40                  |
| Any severe ocular TEAE                           | 9 (5.8)                              | 16                  | 5 (5.6)                              | 8                   | 11 (7.1)                              | 19                  |
| Any SAE <sup>b</sup>                             | 6 (3.9) <sup>b</sup>                 | 6 <sup>b</sup>      | 6 (6.7)                              | 6                   | 14 (9.1)                              | 14                  |
| Any treatment-related SAEs                       | 0 (0.0)                              | 0                   | 1 (1.1)                              | 1                   | 0 (0.0)                               | 0                   |
| Any ocular SAE                                   | 0 (0.0)                              | 0                   | 1 (1.1)                              | 1                   | 0 (0.0)                               | 0                   |
| Deaths                                           | 0 (0.0)                              | 0                   | 0 (0.0)                              | 0                   | 0 (0.0)                               | 0                   |

Data represent patients who received any amount of treatment over the specified time period.

CsA CE: 0.1% ciclosporin A cationic emulsion; TEAE: treatment-emergent adverse event; SAE: serious adverse event.

If a patient had multiple occurrences of an event, the patient was counted only once in the corresponding patient count.

<sup>a</sup> This category is about TEAEs that led to permanent discontinuation of treatment. All patients who stopped treatment were also discontinued from the study, except one patient who continued the study and completed the 6-month randomised treatment phase.

<sup>b</sup> There was 1 SAE that started during the double-masked period (up to Month 6) but its seriousness (i.e. event requiring hospitalization) was known by the investigators after the double-masked period database lock.
